**MO811 HEALTHY LIFESTYLE SCORE AND MORTALITY IN PATIENTS ON HEMODIALYSIS: AN ANALYSIS OF THE DIET-HD STUDY**

Guobin Su<sup>1,2,3</sup>, Valeria Saglimbene<sup>4,5</sup>, Germaine Wong<sup>4</sup>, Marinella Ruospo<sup>5</sup>, Patrizia Natale<sup>4,5</sup>, Jonathan Craig<sup>6</sup>, Jörgen Hegbrant<sup>7</sup>, Juan Jesus Carrero<sup>3</sup>, Giovanni Strippoli<sup>4,5</sup>

<sup>1</sup>National Clinical Research Center for Kidney Disease, State Key Laboratory of Organ Failure Research, Nanfang Hospital, Southern Medical University, Department of Nephrology, Guangzhou, P.R. China, <sup>2</sup>Guangdong Provincial Hospital of Chinese Medicine, The Second Affiliated Hospital, Guangzhou University of Chinese Medicine, Department of Nephrology, Guangzhou, P.R. China, <sup>3</sup>Karolinska Institutet, Department of Medical Epidemiology and Biostatistics, Stockholm, Sweden, <sup>4</sup>The University of Sydney, Sydney School of Public Health, Sydney, Australia, <sup>5</sup>University of Bari, Department of Emergency and Organ Transplantation, Bari, Italy, <sup>6</sup>Flinders University, College of Medicine and Public Health, Adelaide, Australia and <sup>7</sup>Lund University, Department of Nephrology, Lund, Sweden

**BACKGROUND AND AIMS:** A healthy lifestyle promotes cardiovascular health and reduces cardiac-related mortality in the general population, but its benefits in patients treated with hemodialysis are uncertain. The aim of this study was to evaluate the association of a modified American Heart Association (AHA) healthy lifestyle score, and its individual components, with all-cause and cardiovascular mortality in a large multinational cohort of patients treated with long-term hemodialysis.

**METHOD:** Based on the AHA’s recommendations for cardiovascular prevention, a modified healthy lifestyle score was derived from non-smoking, being physically active, higher body mass index (BMI, obesity paradox of higher BMI being protective of death in dialysis patients), healthy diet, and well-controlled systolic blood pressure for participants in the DIET-HD study, a multinational cohort study of adults on hemodialysis. Hazard ratios (aHR) were estimated to evaluate the association between the healthy lifestyle score [low (0-3 points) as the referent, medium (4-6), and high (7-10)] and cardiovascular and all-cause mortality by using cox model.

**RESULTS:** 5483 out of 9757 (56%) patients with complete lifestyle data were followed for a median of 3.8 years (17450.9 person-years). There were 2,163 deaths, of which 826 cardiovascular-related. Compared with patients with a low lifestyle score (963, 18%), the aHRs (95%CI) for all-cause mortality among those with medium (3,621, 66%) and high (899, 16%) were 0.70 (0.63-0.78) and 0.57 (0.49-0.66), respectively. Cardiovascular death was 17% [aHR, 0.83 (0.68-0.99) and 30% (0.70, 0.55-0.90) lower in patients with medium and high lifestyle score, respectively. Results were consistent in stratified or complete-case analyses, and after excluding early deaths. Risk reductions were largely driven by being a non-smoker, physically active and having a higher BMI. 20% of deaths were attributed to a medium/low lifestyle score (population attributable fraction; 95% CI 12-28%).

**CONCLUSION:** A healthier lifestyle, especially non-smoking, regular physical activity, and a higher BMI, is dose-dependently associated with lower all-cause and cardiovascular mortality in hemodialysis patients.

| Lifestyle score                            | Total | Low (0-3) | Medium (4-6)     | High (7-10)      | P for trend |
|--------------------------------------------|-------|-----------|------------------|------------------|-------------|
| <b>All-cause mortality</b>                 |       |           |                  |                  |             |
| Number of observations                     | 5,483 | 963 (18)  | 3,621 (66)       | 899 (16)         |             |
| Number of events                           | 2,163 | 446       | 1,417            | 300              |             |
| Event rate per 1000 person-year            |       | 156       | 122              | 100              |             |
| Univariable random effect                  | 5,483 | Ref       | 0.78 (0.70-0.86) | 0.62 (0.54-0.72) | <0.01       |
| Multivariable random effect                | 5,483 | Ref       | 0.70 (0.63-0.78) | 0.57 (0.49-0.66) | <0.01       |
| Excluding the first 12 months of follow-up | 4,681 | Ref       | 0.71 (0.63-0.80) | 0.57 (0.48-0.68) | <0.01       |
| Multivariable competing risk               | 5,483 | Ref       | 0.62 (0.59-0.75) | 0.55 (0.45-0.63) | <0.01       |
| <b>Cardiovascular mortality</b>            |       |           |                  |                  |             |
| Number of events                           | 826   | 152       | 549              | 125              |             |
| Event rate per 1000 person-year            |       | 53        | 47               | 41               |             |
| Univariable random effect                  | 5,483 | Ref       | 0.89 (0.74-1.06) | 0.75 (0.59-0.96) | <0.01       |
| Multivariable random effect                | 5,483 | Ref       | 0.83 (0.68-0.99) | 0.70 (0.55-0.90) | <0.01       |
| Excluding the first 12 months of follow-up | 4,681 | Ref       | 0.86 (0.69-1.06) | 0.73 (0.55-0.97) | 0.03        |
| Multivariable competing risk               | 5,483 | Ref       | 0.86 (0.67-1.03) | 0.72 (0.50-0.90) | 0.02        |

Downloaded from https://academic.oup.com/ndt/article/36/Supplement\_1/gfab098.003/6289403 by guest on 20 April 2024
